# Supplementary figures and images for: Effects of Zinc Oxide Nanoparticle Exposure on Human Glial Cells and Zebrafish Embryos
Source: MDPI journal article supplement (doi:10.3390/ijms241512297), 2023-08-01

**Figure S1:** Absorbance at 570 nm of ZnO NP dispersed in water. Bars represent standard deviation.

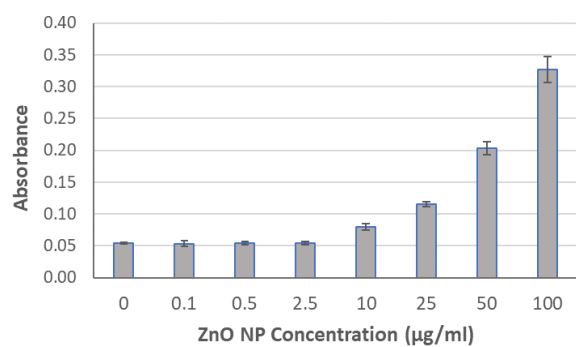

Supplement: s1 [file s1]
